# Supplementary material for: Association between Residential Exposure to Air Pollution and Incident Coronary Heart Disease Is Not Mediated by Leukocyte Telomere Length: A UK Biobank Study
Source: MDPI journal article supplement (doi:10.3390/toxics11060489), 2023-05-28
Supplement: s1 [file s1]

## Supplementary Materials

**Table S1.** UK Biobank field IDs to extract data.

| Field ID | Description                                                                                   |
|----------|-----------------------------------------------------------------------------------------------|
| 22191    | Adjusted T/S ratio                                                                            |
| 24016    | Nitrogen dioxide air pollution; 2005                                                          |
| 24017    | Nitrogen dioxide air pollution; 2006                                                          |
| 24018    | Nitrogen dioxide air pollution; 2007                                                          |
| 24003    | Nitrogen dioxide air pollution; 2010                                                          |
| 24004    | Nitrogen oxides air pollution; 2010                                                           |
| 24019    | Particulate matter air pollution (pm10); 2007                                                 |
| 24005    | Particulate matter air pollution (pm10); 2010                                                 |
| 24007    | Particulate matter air pollution (pm2.5) absorbance; 2010                                     |
| 24006    | Particulate matter air pollution (pm2.5); 2010                                                |
| 24008    | Particulate matter air pollution 2.5-10um; 2010                                               |
| 24500    | Greenspace percentage, buffer 1000m                                                           |
| 131296   | Date I20 first reported (angina pectoris)                                                     |
| 131298   | Date I21 first reported (acute myocardial infarction)                                         |
| 131300   | Date I22 first reported (subsequent myocardial infarction)                                    |
| 131302   | Date I23 first reported (certain current complications following acute myocardial infarction) |
| 131304   | Date I24 first reported (other acute ischemic heart diseases)                                 |
| 131306   | Date I25 first reported (chronic ischemic heart disease)                                      |
| 33       | Date of birth                                                                                 |
| 53       | Date of attending assessment centre                                                           |
| 31       | Sex                                                                                           |
| 21000    | Ethnic background                                                                             |
| 6138     | Qualifications                                                                                |
| 20116    | Smoking status                                                                                |
| 22032    | IPAQ activity group                                                                           |
| 1558     | Alcohol intake frequency                                                                      |

**Table S2.** Casual mediation analysis to estimate average causal mediation effects (ACMEs) through leukocyte telomere length and average direct effects (ADE) of NO<sub>2</sub> concentrations in 2010 in the lower range vs. the average on the risk of incident coronary heart disease.

| <b>NO<sub>2</sub> (-1,-0.5] vs. (-0.5, 0.5]</b> | <b>Estimate</b> | <b>95% CI Lower</b> | <b>95% CI Upper</b> | <b>P-Value</b> |
|-------------------------------------------------|-----------------|---------------------|---------------------|----------------|
| ACME (-0.5, 0.5]                                | 0.000           | 0.000               | 0.000               | <2e-16         |
| ACME (-1, 0.5]                                  | 0.000           | 0.000               | 0.000               | <2e-16         |
| ADE (-0.5, 0.5]                                 | -0.004          | -0.007              | 0.000               | 0.002          |
| ADE (-1, 0.5]                                   | -0.004          | -0.007              | 0.000               | 0.002          |
| Total Effect                                    | -0.004          | -0.007              | 0.000               | 0.002          |
| Prop. Mediated (-0.5, 0.5]                      | 0.016           | 0.006               | 0.050               | 0.002          |
| Prop. Mediated (-1, 0.5]                        | 0.015           | 0.005               | 0.050               | 0.002          |
| <b>ACME (average)</b>                           | 0.000           | 0.000               | 0.000               | <2e-16         |
| <b>ADE (average)</b>                            | -0.004          | -0.007              | 0.000               | 0.002          |
| <b>Prop. Mediated (average)</b>                 | 0.015           | 0.006               | 0.050               | 0.002          |
| <b>NO<sub>2</sub> (-2,-1] vs. (-0.5, 0.5]</b>   |                 |                     |                     |                |
| ACME (-0.5, 0.5]                                | 0.000           | 0.000               | 0.000               | <2e-16         |
| ACME (-2, -1]                                   | 0.000           | 0.000               | 0.000               | <2e-16         |
| ADE (-0.5, 0.5]                                 | -0.009          | -0.012              | -0.010              | <2e-16         |
| ADE (-2, -1]                                    | -0.009          | -0.012              | -0.010              | <2e-16         |
| Total Effect                                    | -0.009          | -0.012              | -0.010              | <2e-16         |
| Prop. Mediated (-0.5, 0.5]                      | 0.014           | 0.008               | 0.030               | <2e-16         |
| Prop. Mediated (-2, -1]                         | 0.013           | 0.007               | 0.030               | <2e-16         |
| <b>ACME (average)</b>                           | 0.000           | 0.000               | 0.000               | <2e-16         |
| <b>ADE (average)</b>                            | -0.009          | -0.012              | -0.010              | <2e-16         |
| <b>Prop. Mediated (average)</b>                 | 0.014           | 0.007               | 0.030               | <2e-16         |
| <b>NO<sub>2</sub> (-Inf,-2] vs. (-0.5, 0.5]</b> |                 |                     |                     |                |
| ACME (-0.5, 0.5]                                | 0.000           | 0.000               | 0.000               | <2e-16         |
| ACME (-Inf, -2]                                 | 0.000           | 0.000               | 0.000               | <2e-16         |
| ADE (-0.5, 0.5]                                 | -0.016          | -0.022              | -0.010              | <2e-16         |
| ADE (-Inf, -2]                                  | -0.016          | -0.022              | -0.010              | <2e-16         |
| Total Effect                                    | -0.016          | -0.022              | -0.010              | <2e-16         |
| Prop. Mediated (-0.5, 0.5]                      | 0.009           | 0.004               | 0.020               | <2e-16         |
| Prop. Mediated (-Inf, -2]                       | 0.008           | 0.003               | 0.020               | <2e-16         |
| <b>ACME (average)</b>                           | 0.000           | 0.000               | 0.000               | <2e-16         |
| <b>ADE (average)</b>                            | -0.016          | -0.022              | -0.010              | <2e-16         |
| <b>Prop. Mediated (average)</b>                 | 0.008           | 0.003               | 0.020               | <2e-16         |

**Table S3.** Casual mediation analysis to estimate average causal mediation effects (ACMEs) through leukocyte telomere length and average direct effects (ADE) of NO<sub>2</sub> concentration averages from 2005 to 2007 in the lower range vs. the average on the risk of incident coronary heart disease.

| <b>NO<sub>2</sub> Avg. (-1,-0.5] vs. (-0.5, 0.5]</b> | <b>Estimate</b> | <b>95% CI Lower</b> | <b>95% CI Upper</b> | <b>P-Value</b> |
|------------------------------------------------------|-----------------|---------------------|---------------------|----------------|
| ACME (-0.5, 0.5]                                     | 0.000           | 0.000               | 0.000               | <2e-16         |
| ACME (-1, 0.5]                                       | 0.000           | 0.000               | 0.000               | <2e-16         |
| ADE (-0.5, 0.5]                                      | -0.003          | -0.005              | 0.000               | 0.094          |
| ADE (-1, 0.5]                                        | -0.003          | -0.005              | 0.000               | 0.094          |
| Total Effect                                         | -0.003          | -0.006              | 0.000               | 0.09           |
| Prop. Mediated (-0.5, 0.5]                           | 0.030           | -0.156              | 0.190               | 0.09           |
| Prop. Mediated (-1, 0.5]                             | 0.029           | -0.157              | 0.190               | 0.09           |
| <b>ACME (average)</b>                                | 0.000           | 0.000               | 0.000               | <2e-16         |
| <b>ADE (average)</b>                                 | -0.003          | -0.005              | 0.000               | 0.094          |
| <b>Prop. Mediated (average)</b>                      | 0.030           | -0.156              | 0.190               | 0.09           |
| <b>NO<sub>2</sub> Avg. (-2,-1] vs. (-0.5, 0.5]</b>   |                 |                     |                     |                |
| ACME (-0.5, 0.5]                                     | 0.000           | 0.000               | 0.000               | <2e-16         |
| ACME (-2, -1]                                        | 0.000           | 0.000               | 0.000               | <2e-16         |
| ADE (-0.5, 0.5]                                      | -0.007          | -0.011              | 0.000               | <2e-16         |
| ADE (-2, -1]                                         | -0.007          | -0.011              | 0.000               | <2e-16         |
| Total Effect                                         | -0.007          | -0.011              | 0.000               | <2e-16         |
| Prop. Mediated (-0.5, 0.5]                           | 0.016           | 0.007               | 0.030               | <2e-16         |
| Prop. Mediated (-2, -1]                              | 0.015           | 0.007               | 0.030               | <2e-16         |
| <b>ACME (average)</b>                                | 0.000           | 0.000               | 0.000               | <2e-16         |
| <b>ADE (average)</b>                                 | -0.007          | -0.011              | 0.000               | <2e-16         |
| <b>Prop. Mediated (average)</b>                      | 0.015           | 0.007               | 0.030               | <2e-16         |
| <b>NO<sub>2</sub> Avg. (-Inf,-2] vs. (-0.5, 0.5]</b> |                 |                     |                     |                |
| ACME (-0.5, 0.5]                                     | 0.000           | 0.000               | 0.000               | <2e-16         |
| ACME (-Inf, -2]                                      | 0.000           | 0.000               | 0.000               | <2e-16         |
| ADE (-0.5, 0.5]                                      | -0.011          | -0.018              | 0.000               | 0.002          |
| ADE (-Inf, -2]                                       | -0.011          | -0.018              | 0.000               | 0.002          |
| Total Effect                                         | -0.012          | -0.018              | 0.000               | 0.002          |
| Prop. Mediated (-0.5, 0.5]                           | 0.012           | 0.005               | 0.030               | 0.002          |
| Prop. Mediated (-Inf, -2]                            | 0.010           | 0.004               | 0.030               | 0.002          |
| <b>ACME (average)</b>                                | 0.000           | 0.000               | 0.000               | <2e-16         |
| <b>ADE (average)</b>                                 | -0.011          | -0.018              | 0.000               | 0.002          |
| <b>Prop. Mediated (average)</b>                      | 0.011           | 0.004               | 0.030               | 0.002          |

**Table S4.** Casual mediation analysis to estimate average causal mediation effects (ACMEs) through leukocyte telomere length and average direct effects (ADE) of NO<sub>x</sub> concentrations in 2010 in the lower range vs. the average on the risk of incident coronary heart disease.

| NO <sub>x</sub> (-1,-0.5] vs. (-0.5, 0.5]       | Estimate | 95% CI Lower | 95% CI | P-Value |
|-------------------------------------------------|----------|--------------|--------|---------|
|                                                 |          |              | Upper  |         |
| ACME (-0.5, 0.5]                                | 0.000    | 0.000        | 0.000  | <2e-16  |
| ACME (-1, 0.5]                                  | 0.000    | 0.000        | 0.000  | <2e-16  |
| ADE (-0.5, 0.5]                                 | -0.004   | -0.006       | 0.000  | 0.02    |
| ADE (-1, 0.5]                                   | -0.004   | -0.006       | 0.000  | 0.02    |
| Total Effect                                    | -0.004   | -0.006       | 0.000  | 0.02    |
| Prop. Mediated (-0.5, 0.5]                      | 0.017    | 0.005        | 0.070  | 0.02    |
| Prop. Mediated (-1, 0.5]                        | 0.016    | 0.005        | 0.070  | 0.02    |
| <b>ACME (average)</b>                           | 0.000    | 0.000        | 0.000  | <2e-16  |
| <b>ADE (average)</b>                            | -0.004   | -0.006       | 0.000  | 0.02    |
| <b>Prop. Mediated (average)</b>                 | 0.016    | 0.005        | 0.070  | 0.02    |
| <b>NO<sub>x</sub> (-2,-1] vs. (-0.5, 0.5]</b>   |          |              |        |         |
| ACME (-0.5, 0.5]                                | 0.000    | 0.000        | 0.000  | <2e-16  |
| ACME (-2, -1]                                   | 0.000    | 0.000        | 0.000  | <2e-16  |
| ADE (-0.5, 0.5]                                 | -0.007   | -0.009       | 0.000  | <2e-16  |
| ADE (-2, -1]                                    | -0.007   | -0.009       | 0.000  | <2e-16  |
| Total Effect                                    | -0.007   | -0.009       | 0.000  | <2e-16  |
| Prop. Mediated (-0.5, 0.5]                      | 0.012    | 0.005        | 0.030  | <2e-16  |
| Prop. Mediated (-2, -1]                         | 0.011    | 0.004        | 0.020  | <2e-16  |
| <b>ACME (average)</b>                           | 0.000    | 0.000        | 0.000  | <2e-16  |
| <b>ADE (average)</b>                            | -0.007   | -0.009       | 0.000  | <2e-16  |
| <b>Prop. Mediated (average)</b>                 | 0.012    | 0.004        | 0.020  | <2e-16  |
| <b>NO<sub>x</sub> (-Inf,-2] vs. (-0.5, 0.5]</b> |          |              |        |         |
| ACME (-0.5, 0.5]                                | 0.000    | 0.000        | 0.000  | 0.004   |
| ACME (-Inf, -2]                                 | 0.000    | 0.000        | 0.000  | 0.004   |
| ADE (-0.5, 0.5]                                 | -0.015   | -0.021       | -0.010 | <2e-16  |
| ADE (-Inf, -2]                                  | -0.015   | -0.021       | -0.010 | <2e-16  |
| Total Effect                                    | -0.015   | -0.021       | -0.010 | <2e-16  |
| Prop. Mediated (-0.5, 0.5]                      | 0.008    | 0.003        | 0.020  | 0.004   |
| Prop. Mediated (-Inf, -2]                       | 0.007    | 0.002        | 0.010  | 0.004   |
| <b>ACME (average)</b>                           | 0.000    | 0.000        | 0.000  | 0.004   |
| <b>ADE (average)</b>                            | -0.015   | -0.021       | -0.010 | <2e-16  |
| <b>Prop. Mediated (average)</b>                 | 0.007    | 0.002        | 0.020  | 0.004   |

**Table S5.** Casual mediation analysis to estimate average causal mediation effects (ACMEs) through leukocyte telomere length and average direct effects (ADE) of PM<sub>2.5</sub> concentrations in 2010 in the lower range vs. the average on the risk of incident coronary heart disease.

| <b>PM<sub>2.5</sub> (-1,-0.5] vs. (-0.5, 0.5]</b> | <b>Estimate</b> | <b>95% CI Lower</b> | <b>95% CI Upper</b> | <b>P-Value</b> |
|---------------------------------------------------|-----------------|---------------------|---------------------|----------------|
| ACME (-0.5, 0.5]                                  | 0.000           | 0.000               | 0.000               | <2e-16         |
| ACME (-1, 0.5]                                    | 0.000           | 0.000               | 0.000               | <2e-16         |
| ADE (-0.5, 0.5]                                   | -0.003          | -0.006              | 0.000               | 0.032          |
| ADE (-1, 0.5]                                     | -0.003          | -0.006              | 0.000               | 0.032          |
| Total Effect                                      | -0.003          | -0.006              | 0.000               | 0.028          |
| Prop. Mediated (-0.5, 0.5]                        | 0.021           | 0.006               | 0.120               | 0.028          |
| Prop. Mediated (-1, 0.5]                          | 0.020           | 0.005               | 0.120               | 0.028          |
| <b>ACME (average)</b>                             | 0.000           | 0.000               | 0.000               | <2e-16         |
| <b>ADE (average)</b>                              | -0.003          | -0.006              | 0.000               | 0.032          |
| <b>Prop. Mediated (average)</b>                   | 0.020           | 0.005               | 0.120               | 0.028          |
| <b>PM<sub>2.5</sub> (-2,-1] vs. (-0.5, 0.5]</b>   |                 |                     |                     |                |
| ACME (-0.5, 0.5]                                  | 0.000           | 0.000               | 0.000               | 0.004          |
| ACME (-2, -1]                                     | 0.000           | 0.000               | 0.000               | 0.004          |
| ADE (-0.5, 0.5]                                   | -0.007          | -0.010              | 0.000               | <2e-16         |
| ADE (-2, -1]                                      | -0.007          | -0.010              | 0.000               | <2e-16         |
| Total Effect                                      | -0.007          | -0.011              | 0.000               | <2e-16         |
| Prop. Mediated (-0.5, 0.5]                        | 0.009           | 0.003               | 0.020               | 0.004          |
| Prop. Mediated (-2, -1]                           | 0.009           | 0.003               | 0.020               | 0.004          |
| <b>ACME (average)</b>                             | 0.000           | 0.000               | 0.000               | 0.004          |
| <b>ADE (average)</b>                              | -0.007          | -0.010              | 0.000               | <2e-16         |
| <b>Prop. Mediated (average)</b>                   | 0.009           | 0.003               | 0.020               | 0.004          |
| <b>PM<sub>2.5</sub> (-Inf,-2] vs. (-0.5, 0.5]</b> |                 |                     |                     |                |
| ACME (-0.5, 0.5]                                  | 0.000           | 0.000               | 0.000               | <2e-16         |
| ACME (-Inf, -2]                                   | 0.000           | 0.000               | 0.000               | <2e-16         |
| ADE (-0.5, 0.5]                                   | -0.012          | -0.017              | -0.010              | <2e-16         |
| ADE (-Inf, -2]                                    | -0.012          | -0.017              | -0.010              | <2e-16         |
| Total Effect                                      | -0.012          | -0.017              | -0.010              | <2e-16         |
| Prop. Mediated (-0.5, 0.5]                        | 0.014           | 0.007               | 0.030               | <2e-16         |
| Prop. Mediated (-Inf, -2]                         | 0.012           | 0.006               | 0.030               | <2e-16         |
| <b>ACME (average)</b>                             | 0.000           | 0.000               | 0.000               | <2e-16         |
| <b>ADE (average)</b>                              | -0.012          | -0.017              | -0.010              | <2e-16         |
| <b>Prop. Mediated (average)</b>                   | 0.013           | 0.006               | 0.030               | <2e-16         |

**Table S6.** Casual mediation analysis to estimate average causal mediation effects (ACMEs) through leukocyte telomere length and average direct effects (ADE) of PM<sub>2.5</sub> absorbance concentrations in 2010 in the lower range vs. the average on the risk of incident coronary heart disease.

| <b>PM<sub>2.5</sub> Abs. (-1,-0.5] vs. (-0.5, 0.5]</b> | <b>Estimate</b> | <b>95% CI Lower</b> | <b>95% CI Upper</b> | <b>P-Value</b> |
|--------------------------------------------------------|-----------------|---------------------|---------------------|----------------|
| ACME (-0.5, 0.5]                                       | 0.000           | 0.000               | 0.000               | 0.408          |
| ACME (-1, 0.5]                                         | 0.000           | 0.000               | 0.000               | 0.408          |
| ADE (-0.5, 0.5]                                        | -0.004          | -0.006              | 0.000               | 0.012          |
| ADE (-1, 0.5]                                          | -0.004          | -0.006              | 0.000               | 0.012          |
| Total Effect                                           | -0.004          | -0.006              | 0.000               | 0.012          |
| Prop. Mediated (-0.5, 0.5]                             | 0.004           | -0.006              | 0.020               | 0.412          |
| Prop. Mediated (-1, 0.5]                               | 0.004           | -0.006              | 0.020               | 0.412          |
| <b>ACME (average)</b>                                  | 0.000           | 0.000               | 0.000               | 0.408          |
| <b>ADE (average)</b>                                   | -0.004          | -0.006              | 0.000               | 0.012          |
| <b>Prop. Mediated (average)</b>                        | 0.004           | -0.006              | 0.020               | 0.412          |
| <b>PM<sub>2.5</sub> Abs. (-2,-1] vs. (-0.5, 0.5]</b>   |                 |                     |                     |                |
| ACME (-0.5, 0.5]                                       | 0.000           | 0.000               | 0.000               | <2e-16         |
| ACME (-2, -1]                                          | 0.000           | 0.000               | 0.000               | <2e-16         |
| ADE (-0.5, 0.5]                                        | -0.006          | -0.009              | 0.000               | <2e-16         |
| ADE (-2, -1]                                           | -0.006          | -0.009              | 0.000               | <2e-16         |
| Total Effect                                           | -0.006          | -0.009              | 0.000               | <2e-16         |
| Prop. Mediated (-0.5, 0.5]                             | 0.012           | 0.005               | 0.030               | <2e-16         |
| Prop. Mediated (-2, -1]                                | 0.011           | 0.004               | 0.030               | <2e-16         |
| <b>ACME (average)</b>                                  | 0.000           | 0.000               | 0.000               | <2e-16         |
| <b>ADE (average)</b>                                   | -0.006          | -0.009              | 0.000               | <2e-16         |
| <b>Prop. Mediated (average)</b>                        | 0.011           | 0.004               | 0.030               | <2e-16         |
| <b>PM<sub>2.5</sub> Abs. (-Inf,-2] vs. (-0.5, 0.5]</b> |                 |                     |                     |                |
| ACME (-0.5, 0.5]                                       | 0.000           | 0.000               | 0.000               | 0.17           |
| ACME (-Inf, -2]                                        | 0.000           | 0.000               | 0.000               | 0.17           |
| ADE (-0.5, 0.5]                                        | -0.011          | -0.017              | 0.000               | <2e-16         |
| ADE (-Inf, -2]                                         | -0.011          | -0.017              | 0.000               | <2e-16         |
| Total Effect                                           | -0.011          | -0.017              | 0.000               | <2e-16         |
| Prop. Mediated (-0.5, 0.5]                             | 0.006           | -0.003              | 0.020               | 0.17           |
| Prop. Mediated (-Inf, -2]                              | 0.005           | -0.003              | 0.020               | 0.17           |
| <b>ACME (average)</b>                                  | 0.000           | 0.000               | 0.000               | 0.17           |
| <b>ADE (average)</b>                                   | -0.011          | -0.017              | 0.000               | <2e-16         |
| <b>Prop. Mediated (average)</b>                        | 0.005           | -0.003              | 0.020               | 0.17           |

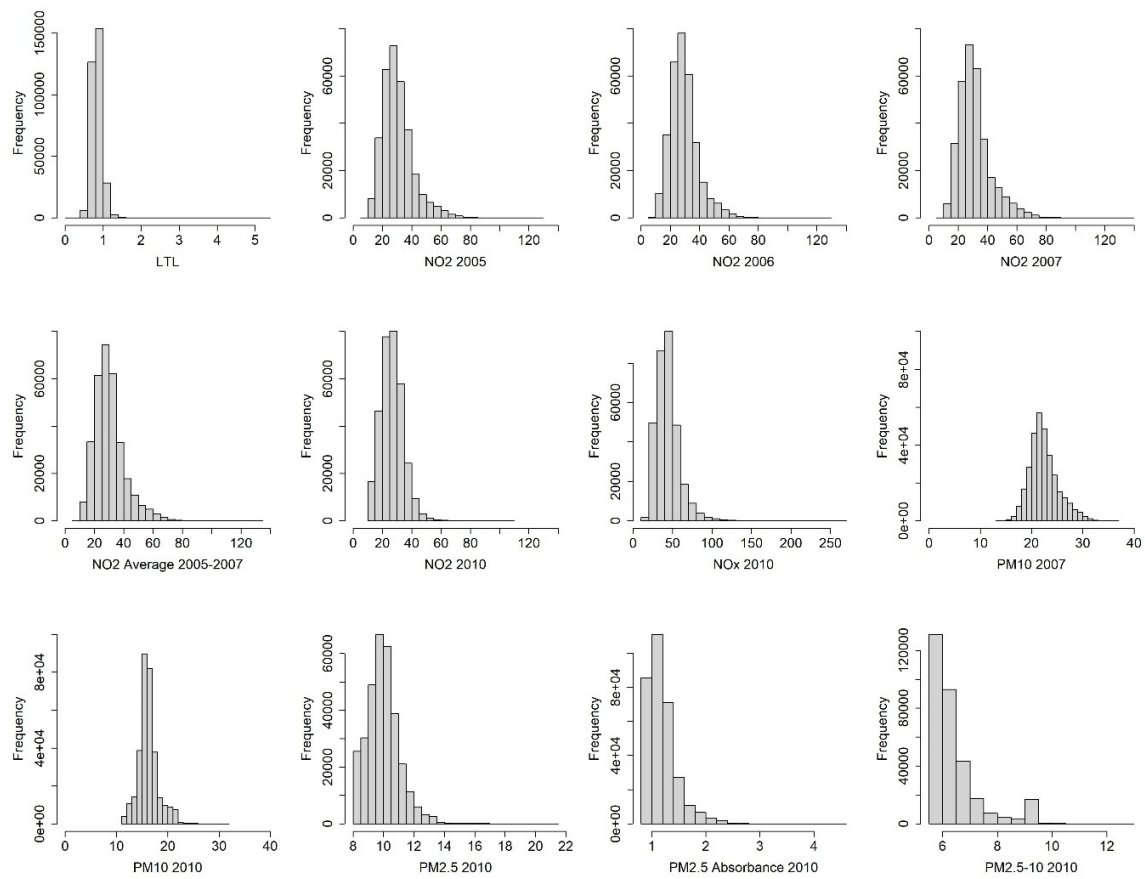

**Figure S1.** Histograms of leukocyte telomere length and pollutant concentrations.

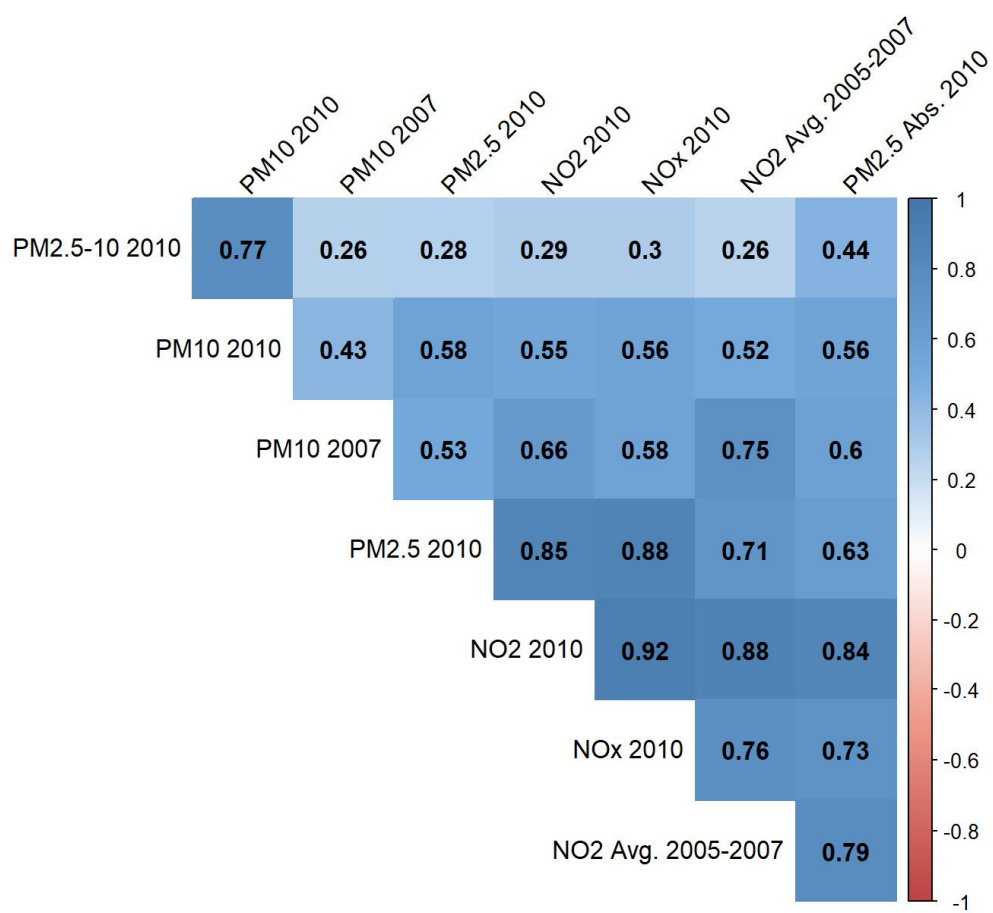

**Figure S2.** Spearman correlations between air pollutants.



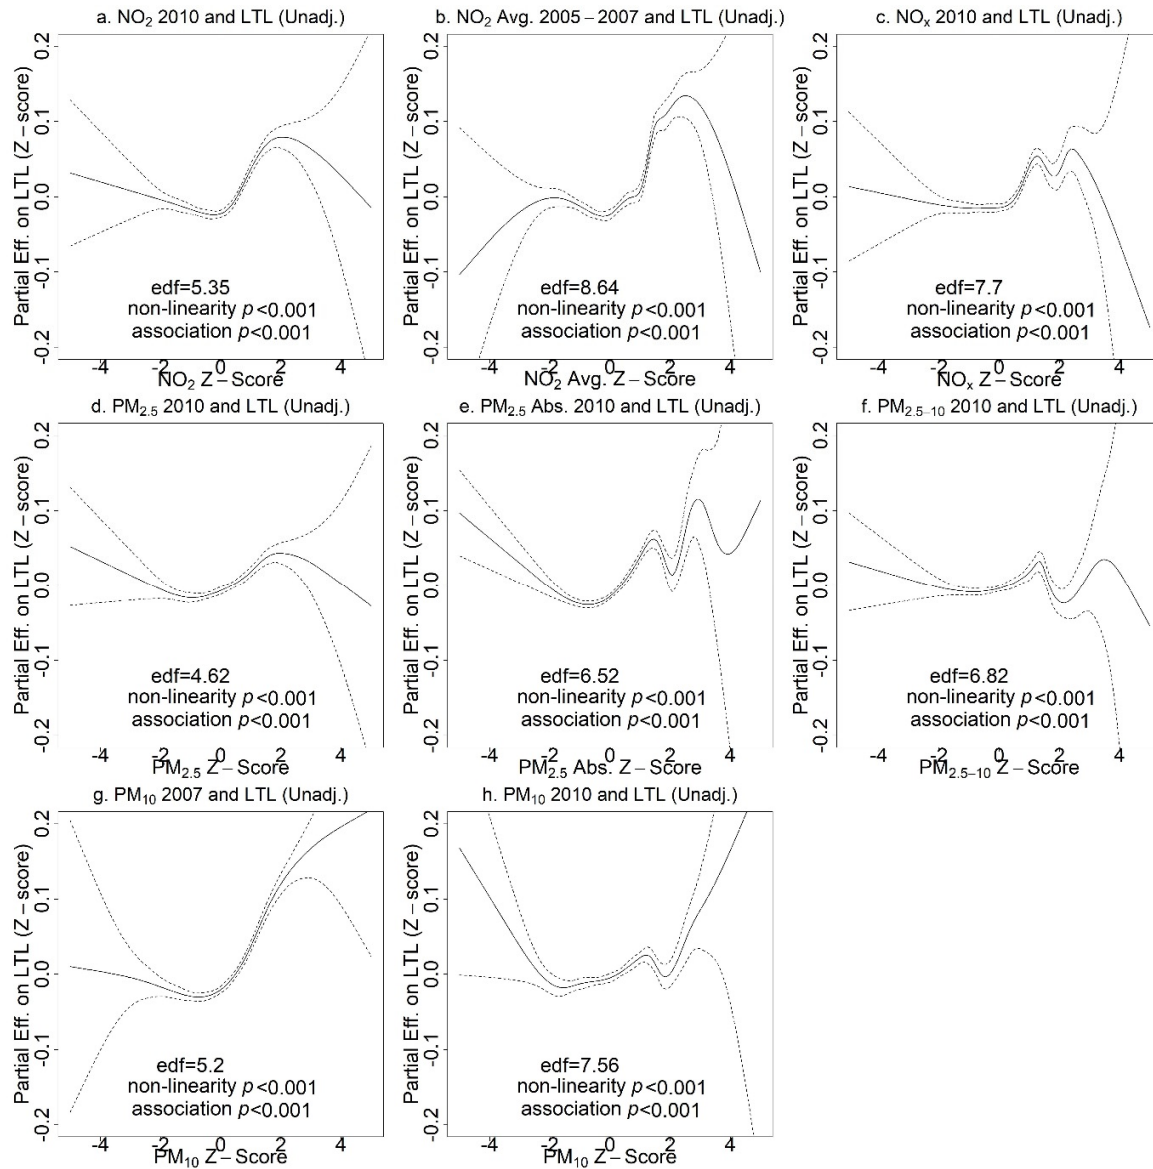

**Figure S3.** Generalized additive model (GAM) plots of the partial effects of air pollutants on leukocyte telomere length, with no adjustment for covariates. The tick marks on the x-axis are z-scores of an air pollutant. The y-axis represents the partial effect of each air pollutant. The areas between dash lines indicate the 95% confidence intervals. (a) NO<sub>2</sub> 2010 and LTL; (b) NO<sub>2</sub> average 2005-2007 and LTL; (c) NO<sub>x</sub> 2010 and LTL; (d) PM<sub>2.5</sub> 2010 and LTL; (e) PM<sub>2.5</sub> absorbance and LTL; (f) PM<sub>2.5-10</sub> 2010 and LTL; (g) PM<sub>10</sub> 2007 and LTL; (h) PM<sub>10</sub> 2010 and LTL.
